# Supplementary material
Source: PubMed Central journal article supplement (PMC8806080)
Supplement: ASN.2021040433SupplementaryData.pdf [file ASN.2021040433SupplementaryData.pdf]

**Donor-specific antibody is associated with increased expression of rejection transcripts in renal transplant biopsies classified as no rejection**

Katelynn S. Madill-Thomsen<sup>1</sup>, Georg A. Böhmig<sup>2</sup>, Jonathan Bromberg<sup>3</sup>, Gunilla Einecke<sup>4</sup>, Farsad Eskandary<sup>2</sup>, Gaurav Gupta<sup>5</sup>, Luis G. Hidalgo<sup>6</sup>, Marek Myslak<sup>7</sup>, Ondrej Viklicky<sup>8</sup>, Agnieszka Perkowska-Ptasinska<sup>9</sup>, Philip F. Halloran<sup>1,2</sup>, and the INTERCOMEX Investigators<sup>11</sup>

<sup>1</sup>Alberta Transplant Applied Genomics Centre, Edmonton, Alberta, Canada; <sup>2</sup>Division of Nephrology and Dialysis, Department of Medicine III, Medical University of Vienna, Vienna, Austria; <sup>3</sup>University of Maryland, Baltimore, MD, USA; <sup>4</sup>Department of Nephrology, Hannover Medical School, Hannover, Germany; <sup>5</sup>Division of Nephrology, Virginia Commonwealth University, Richmond, VA, United States; <sup>6</sup>University of Wisconsin, Madison, WI, USA; <sup>7</sup>Pomeranian Medical University, Department of Clinical Interventions, Department of Nephrology and Kidney Transplantation SPWSZ Hospital, Szczecin, Poland; <sup>8</sup>Department of Nephrology and Transplant Center, Institute for Clinical and Experimental Medicine, Prague, Czech Republic; <sup>9</sup>Department of Pathology, Medical University of Warsaw, Warsaw, Poland; <sup>10</sup>Department of Medicine, Division of Nephrology and Transplant Immunology, University of Alberta, Edmonton, Alberta, Canada; <sup>11</sup>Details listed in **Supplementary Table 1**.

**Supplementary Material**

**Table of Contents**

Supplementary Table 1. Participating Centers ..... 3

Supplementary Table 2. List of abbreviations and their definitions used in the manuscript..... 4

Supplementary Table 3. Demographics and clinical features of the 1679 biopsy cohort and 1012 No Rejection only biopsy cohort ..... 5

Supplementary Table 4. Histologic diagnoses and DSA status in the kidney 1679 cohort, and in the 1012 no rejection cohort (N, % of total) ..... 6

Supplementary Table 5. DSA detail in full population (1394 tested of 1679 total) and in NR biopsies (835 tested of 1012 total). ..... 7

Supplementary Table 6. Mean PBT scores in DSA+ vs DSA- biopsies within archetypally-assigned NR, ABMR, and TCMR groups. .... 8

Supplementary Figure 1. Venn diagram showing relationships between A) histologically and B) molecularly defined NR (blue) and ABMR (purple), the DSAprob score >0.47 (orange), and the ABMRpm score >0.2 (green)..... 9

**Supplementary Table 1. Participating Centers**

| <b>Location</b>             | <b>Principal investigators</b>                 | <b>Samples contributed</b> |
|-----------------------------|------------------------------------------------|----------------------------|
| <b>Birmingham, AL, USA</b>  | Roslyn Mannon                                  | 28                         |
| <b>Barcelona, Spain</b>     | Daniel Serón and Joana Sellarés                | 71                         |
| <b>Bronx, NY, USA</b>       | Enver Akalin                                   | 33                         |
| <b>Manchester, UK</b>       | Declan de Freitas and Michael Picton           | 39                         |
| <b>Baltimore, MD, USA</b>   | Jonathan Bromberg and Matt Weir                | 72                         |
| <b>Berlin, Germany</b>      | Klemens Budde and Timm Heinbokel               | 12                         |
| <b>Hannover, Germany</b>    | Gunilla Einecke                                | 67                         |
| <b>Harrisburg, PA, USA</b>  | Harold Yang and Seth Narins                    | 12                         |
| <b>Detroit, MI, USA</b>     | Milagros Samaniego-Picota                      | 1                          |
| <b>Paris, France</b>        | Carmen Lefaucheur, Alexandre Loupy             | 212                        |
| <b>Poland</b>               | Marek Myslak and Agnieszka Perkowska-Ptasinska | 2                          |
| <b>San Antonio, TX, USA</b> | Adam Bingaman                                  | 83                         |
| <b>St Louis, MO, USA</b>    | Daniel Brennan and Andrew Malone               | 20                         |
| <b>Minneapolis, MN, USA</b> | Bertram Kasiske                                | 6                          |
| <b>Edmonton, AB, CA</b>     | Philip F Halloran                              | 487                        |
| <b>Minneapolis, MN, USA</b> | Arthur Matas                                   | 76                         |
| <b>Madison, WI, USA</b>     | Arjang Djamali                                 | 10                         |
| <b>Vienna, Austria</b>      | Georg Böhmig and Farsad Eskandary              | 198                        |
| <b>Richmond, VA, USA</b>    | Gaurav Gupta                                   | 250                        |
| <b>TOTAL</b>                |                                                | <b>1679</b>                |

| <b>Supplementary Table 2. List of abbreviations and their definitions used in the manuscript</b> |                                                                                                                                 |
|--------------------------------------------------------------------------------------------------|---------------------------------------------------------------------------------------------------------------------------------|
| <b>Abbreviation</b>                                                                              | <b>Definition</b>                                                                                                               |
| ABMR                                                                                             | antibody-mediated rejection                                                                                                     |
| ABMRpm                                                                                           | ABMR classifier (ABMR, [C4d-negative and C4d-positive] vs. everything else)                                                     |
| AUC                                                                                              | area under the curve                                                                                                            |
| DSA                                                                                              | donor-specific HLA antibody                                                                                                     |
| DSA <sub>Prob</sub>                                                                              | DSA probability                                                                                                                 |
| eGFR                                                                                             | estimated glomerular filtration rate                                                                                            |
| INTERCOMEX                                                                                       | Diagnostic and Therapeutic Applications of Microarrays in Organ Transplantation<br>(ClinicalTrials.gov Identifier: NCT01299168) |
| EABMR                                                                                            | early-stage ABMR                                                                                                                |
| FABMR                                                                                            | fully-developed ABMR                                                                                                            |
| LABMR                                                                                            | late-stage ABMR                                                                                                                 |
| MMDx                                                                                             | Molecular Microscope <sup>®</sup> Diagnostic System                                                                             |
| NR                                                                                               | no rejection                                                                                                                    |
| PCA                                                                                              | principal component analysis                                                                                                    |
| PC1                                                                                              | principal component 1                                                                                                           |
| PC2                                                                                              | principal component 2                                                                                                           |
| PC3                                                                                              | principal component 3                                                                                                           |
| SOC                                                                                              | standard-of-care                                                                                                                |
| TCMR                                                                                             | T cell-mediated rejection                                                                                                       |
| UMAP                                                                                             | uniform manifold approximation and projection                                                                                   |

**Supplementary Table 3.** Demographics and clinical features of the 1679 biopsy cohort and 1012 No Rejection only biopsy cohort

| Patient Demographics                                  |                                                      | All patients<br>(N=1381) | NR patients<br>(N=894)  |
|-------------------------------------------------------|------------------------------------------------------|--------------------------|-------------------------|
| Mean recipient age (range)                            |                                                      | 51 (8 – 91)              | 52 (19 – 91)            |
| Recipient Gender Male (% male)                        |                                                      | 702 (51%)                | 524 (64%)               |
| Ethnicity                                             | Caucasian                                            | 607                      | 423                     |
|                                                       | Black                                                | 171                      | 120                     |
|                                                       | Other                                                | 147                      | 101                     |
|                                                       | Not available <sup>a</sup>                           | 456                      | 250                     |
| Primary Disease                                       | Diabetic nephropathy (DN)                            | 211                      | 153                     |
|                                                       | Hypertension / large vessel disease                  | 94                       | 77                      |
|                                                       | Glomerulonephritis / vasculitis (GN)                 | 47                       | 258                     |
|                                                       | Interstitial nephritis / pyelonephritis              | 26                       | 62                      |
|                                                       | Polycystic kidney disease                            | 125                      | 99                      |
|                                                       | Others                                               | 767                      | 78                      |
|                                                       | Unknown etiology                                     | 111                      | 167                     |
| Mean donor age (range)                                |                                                      | 44 (0.03 – 85)           | 45 (3 – 85)             |
| Donor gender (% male)                                 |                                                      | 386 (28%)                | 297 (46%)               |
| Donor type (% deceased donor transplants)             |                                                      | 889 (64%)                | 608 (70%)               |
| Latest kidney status<br>(% of total)                  | Functioning graft                                    | 964 (70%)                | 684 (77%)               |
|                                                       | Graft failure/return to dialysis                     | 208 (15%)                | 116 (13%)               |
|                                                       | Patient death with functioning graft                 | 26 (6%)                  | 16 (2%)                 |
|                                                       | Mean (median) follow-up (functioning grafts) in days | 651 (285)                | 805 (493)               |
| Biopsy data                                           |                                                      | All biopsies<br>(N=1679) | NR biopsies<br>(N=1012) |
| Median time of biopsy post-transplant in days (range) |                                                      | 650 (1 – 12371)          | 375 (1 – 11453)         |
| Early biopsies (< 1 year) (% total)                   |                                                      | 709 (42%) <sup>b</sup>   | 496 (49%)               |
| Late biopsies (≥ 1 year) (% total)                    |                                                      | 966 (57%) <sup>b</sup>   | 516 (31%)               |
| Indication for biopsy<br>(% of total)                 | Primary non-function                                 | 10 (1%)                  | 10 (1%)                 |
|                                                       | Rapid deterioration of graft function                | 292 (17%)                | 145 (14%)               |
|                                                       | Slow deterioration of graft function                 | 307 (18%)                | 189 (19%)               |
|                                                       | Stable impaired graft function                       | 92 (5%)                  | 72 (7%)                 |
|                                                       | Investigate proteinuria/rejection/BK/creatinine      | 247 (15%)                | 284 (28%)               |
|                                                       | Delayed graft function                               | 74 (4%)                  | 57 (6%)                 |
|                                                       | Others                                               | 617 (37%)                | 233 (23%)               |
|                                                       | Indication not specified                             | 40 (2%)                  | 22 (2%)                 |

Abbreviations: NR, no rejection. DN, diabetic nephropathy. GN, glomerulonephritis. BK, polyoma virus.

<sup>a</sup>Some centers preferred not to identify ethnicity

<sup>b</sup>Four biopsies had no provided date of transplant

**Supplementary Table 4.** Histologic diagnoses and DSA status in the kidney 1679 cohort, and in the 1012 no rejection cohort (N, % of total)

|                                                                        |                              |                           | All biopsies                  |                                       | NR biopsies                        |                                              |
|------------------------------------------------------------------------|------------------------------|---------------------------|-------------------------------|---------------------------------------|------------------------------------|----------------------------------------------|
|                                                                        |                              |                           | N<br>(% of<br>total=1679)     | DSA+<br>N (% of known<br>DSA per row) | N in NR<br>(% of total = 1012)     | DSA+ in NR:<br>N (% of known<br>DSA per row) |
| <b>Histologic Rejection<br/>N = 612<br/>(36% of all diagnoses)</b>     | <b>ABMR-related</b>          | ABMR                      | 333 (20%)                     | 219 (74%)                             | 78 (8%)                            | 46 (68%)                                     |
|                                                                        |                              | Transplant glomerulopathy | 51 (3%)                       | 11 (27%)                              | 20 (2%)                            | 3 (18%)                                      |
|                                                                        |                              | ABMR suspected            | 33 (2%)                       | 8 (30%)                               | 14 (1%)                            | 2 (18%)                                      |
|                                                                        | Mixed (TCMR plus ABMR)       |                           | 56 (3%)                       | 28 (60%)                              | 3 (0%)                             | 1 (33%)                                      |
|                                                                        | TCMR <sup>a</sup>            |                           | 139 (8%)                      | 32 (29%)                              | 42 (4%)                            | 8 (21%)                                      |
| <b>Borderline</b>                                                      |                              |                           | 128 (8%)                      | 32 (28%)                              | 91 (9%)                            | 22 (27%)                                     |
| <b>Histologic No Rejection<br/>N = 939<br/>(56% of all diagnoses)</b>  | AKI                          |                           | 117 (7%)                      | 30 (33%)                              | 108 (11%)                          | 26 (31%)                                     |
|                                                                        | BK                           |                           | 52 (3%)                       | 5 (12%)                               | 28 (3%)                            | 2 (9%)                                       |
|                                                                        | Diabetic Nephropathy         |                           | 24 (1%)                       | 7 (54%)                               | 19 (2%)                            | 5 (56%)                                      |
|                                                                        | Glomerulonephritis           |                           | 108 (6%)                      | 27 (34%)                              | 84 (8%)                            | 19 (31%)                                     |
|                                                                        | IFTA not otherwise specified |                           | 193 (11%)                     | 49 (30%)                              | 160 (16%)                          | 38 (28%)                                     |
|                                                                        | No major abnormalities       |                           | 371 (22%)                     | 113 (35%)                             | 311 (31%)                          | 88 (33%)                                     |
|                                                                        | Others <sup>b</sup>          |                           | 74 (4%)                       | 15 (29%)                              | 54 (5%)                            | 11 (31%)                                     |
|                                                                        | All NR excluding Borderline  |                           | 939 (56%)                     | 246 (32%)                             | 764 (75%)                          | 189 (31%)                                    |
| <b>Patient HLA antibody status at DSA at time of biopsy (N = 1679)</b> |                              |                           | <b>N (% of N=1394 tested)</b> |                                       | <b>N in NR (% of N=835 tested)</b> |                                              |
| DSA positive                                                           |                              |                           | 576 (41%)                     |                                       | 271 (32%)                          |                                              |
| DSA negative, PRA positive                                             |                              |                           | 277 (20%)                     |                                       | 175 (21%)                          |                                              |
| DSA negative, PRA unknown                                              |                              |                           | 148 (11%)                     |                                       | 92 (11%)                           |                                              |
| PRA negative/DSA negative                                              |                              |                           | 393 (28%)                     |                                       | 297 (36%)                          |                                              |
| DSA not tested                                                         |                              |                           | 264                           |                                       | 163                                |                                              |

Abbreviations: ABMR, antibody-mediated rejection. AKI, acute kidney injury. BK, polyoma virus. DSA, donor specific antibody. HLA, human leukocyte antigen. IFTA, interstitial fibrosis and tubular atrophy. NR, no rejection. PRA, panel reactive antibody. TCMR, T cell-mediated rejection.

<sup>a</sup>Three biopsies had histology diagnoses of both TCMR and BK virus - we have categorized these as TCMR in this table and throughout the paper.

<sup>b</sup>Others includes calcineurin inhibitor toxicity, C4d deposition without morphologic evidence for active rejection, donor origin vascular disease, pyelonephritis, systemic infection/diarrhea, and bacterial infection.

**Supplementary Table 5.** DSA detail in full population (1394 tested of 1679 total) and in NR biopsies (835 tested of 1012 total).

|                               | <b>All biopsies<br/>N (% of N=1394<br/>tested)</b> | <b>NR biopsies<br/>N (% of N=835<br/>tested)</b> |
|-------------------------------|----------------------------------------------------|--------------------------------------------------|
| <b>DSA Class I</b>            | 74 (5%)                                            | 35 (4%)                                          |
| <b>DSA Class I/II</b>         | 113 (8%)                                           | 44 (5%)                                          |
| <b>DSA Class II</b>           | 191 (14%)                                          | 97 (12%)                                         |
| <b>DSA Negative</b>           | 818 (59%)                                          | 564 (68%)                                        |
| <b>DSA Positive</b>           | 198 (14%)                                          | 95 (11%)                                         |
| <b>Not done/Not available</b> | 285                                                | 163                                              |

| <b>Supplementary Table 6.</b> Mean PBT scores in DSA+ vs DSA- biopsies within archetypally-assigned NR, ABMR, and TCMR groups. |          |                                          |                     |                                           |                     |                                          |                    |
|--------------------------------------------------------------------------------------------------------------------------------|----------|------------------------------------------|---------------------|-------------------------------------------|---------------------|------------------------------------------|--------------------|
|                                                                                                                                |          | <b>NR</b><br>(N=1012, 835 with DSA data) |                     | <b>ABMR</b><br>(N=514, 436 with DSA data) |                     | <b>TCMR</b><br>(N=116, 94 with DSA data) |                    |
|                                                                                                                                |          | <b>DSA+ (N=271)</b>                      | <b>DSA- (N=564)</b> | <b>DSA+ (N=262)</b>                       | <b>DSA- (N=174)</b> | <b>DSA+ (N=26)</b>                       | <b>DSA- (N=68)</b> |
| <b>TCMR</b>                                                                                                                    | QCAT     | 1.54                                     | 1.51                | 2.43                                      | 2.45                | 4.81                                     | 4.82               |
|                                                                                                                                | TCB      | 1.90                                     | 1.85                | 3.07                                      | 3.14                | 8.12                                     | 7.99               |
|                                                                                                                                | TCMR-RAT | 1.47                                     | 1.44                | 2.18                                      | 2.19                | 5.25                                     | 4.98               |
| <b>ABMR</b>                                                                                                                    | DSAST    | 1.06 <sup>a</sup>                        | 1.03                | 1.58 <sup>b</sup>                         | 1.44                | 1.19 <sup>a</sup>                        | 1.12               |
|                                                                                                                                | NKB      | 1.30 <sup>a</sup>                        | 1.26                | 2.32 <sup>a</sup>                         | 2.09                | 1.78                                     | 1.80               |
|                                                                                                                                | ABMR-RAT | 1.40 <sup>b</sup>                        | 1.30                | 2.64 <sup>a</sup>                         | 2.42                | 3.10                                     | 2.96               |
| <b>Rejection</b>                                                                                                               | GRIT1    | 1.37 <sup>a</sup>                        | 1.31                | 1.96                                      | 1.90                | 2.62                                     | 2.66               |
|                                                                                                                                | Rej-RAT  | 1.65 <sup>a</sup>                        | 1.51                | 3.37 <sup>a</sup>                         | 3.13                | 5.46                                     | 5.24               |
| <b>Macrophages</b>                                                                                                             | AMAT1    | 1.32                                     | 1.30                | 1.74                                      | 1.75                | 2.62                                     | 2.53               |
|                                                                                                                                | QCMAT    | 1.24                                     | 1.23                | 1.55                                      | 1.54                | 2.44                                     | 2.36               |
| <b>Recent injury</b>                                                                                                           | IRITD3   | 1.01                                     | 1.02                | 1.06                                      | 1.07                | 1.15                                     | 1.15               |
|                                                                                                                                | IRITD5   | 1.23                                     | 1.25                | 1.32 <sup>a</sup>                         | 1.36                | 1.55                                     | 1.54               |
|                                                                                                                                | IRRAT30  | 1.17                                     | 1.17                | 1.32                                      | 1.37                | 2.03                                     | 2.21               |
| <b>Atrophy-fibrosis</b>                                                                                                        | IGT      | 1.60                                     | 1.48                | 2.42                                      | 2.24                | 5.62                                     | 3.56               |
| <sup>a</sup> t-test <i>P</i> value of DSA+ vs. DSA- <0.05<br><sup>b</sup> t-test <i>P</i> value of DSA+ vs. DSA- <0.001        |          |                                          |                     |                                           |                     |                                          |                    |



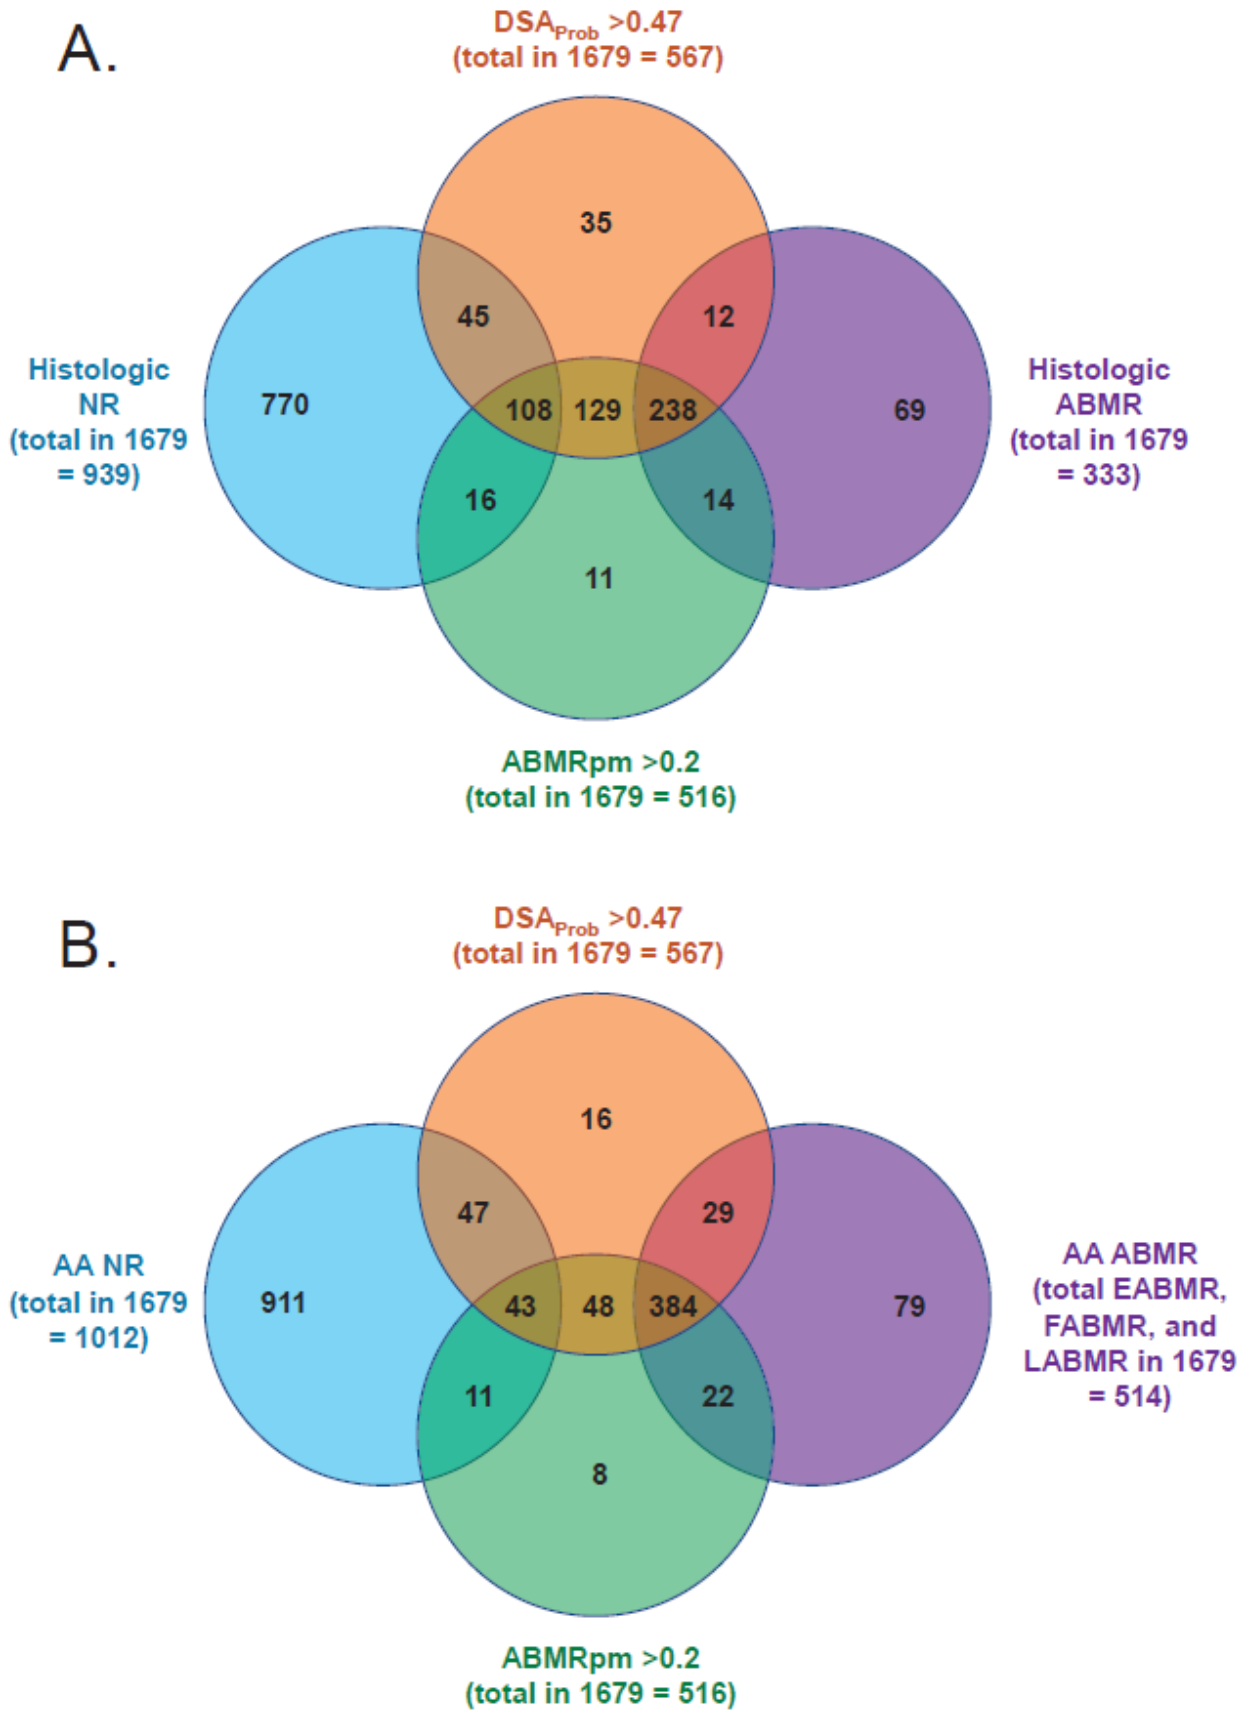

**Supplementary Figure 1.** Venn diagram showing relationships between A) histologically and B) molecularly defined NR (blue) and ABMR (purple), the DSA<sub>prob</sub> score >0.47 (orange), and the ABMR<sub>pm</sub> score >0.2 (green). Cutoffs are the same as those used in Figure 3. Overlaps are labeled with the number of biopsies that fit those criteria.
